# Supplementary material
Source: ML conference proceedings conference paper supplement (https://openaccess.thecvf.com/content/ICCV2021/html/Guo_Learning_To_Adversarially_ICCV_2021_paper.html)
Supplement: Supplementary file 3 [file Guo_Learning_To_Adversarially_ICCV_2021_supplemental.zip]

Archive with 20 entries (19 files):
- ICCV21_MotAdv_Supp/
- __MACOSX/._ICCV21_MotAdv_Supp
- ICCV21_MotAdv_Supp/.DS_Store
- __MACOSX/ICCV21_MotAdv_Supp/._.DS_Store
- ICCV21_MotAdv_Supp/case4.gif
- __MACOSX/ICCV21_MotAdv_Supp/._case4.gif
- ICCV21_MotAdv_Supp/case5.gif
- __MACOSX/ICCV21_MotAdv_Supp/._case5.gif
- ICCV21_MotAdv_Supp/case6.gif
- __MACOSX/ICCV21_MotAdv_Supp/._case6.gif
- ICCV21_MotAdv_Supp/case2.gif
- __MACOSX/ICCV21_MotAdv_Supp/._case2.gif
- ICCV21_MotAdv_Supp/case3.gif
- __MACOSX/ICCV21_MotAdv_Supp/._case3.gif
- ICCV21_MotAdv_Supp/case1.gif
- __MACOSX/ICCV21_MotAdv_Supp/._case1.gif
- ICCV21_MotAdv_Supp/case0.gif
- __MACOSX/ICCV21_MotAdv_Supp/._case0.gif
- ICCV21_MotAdv_Supp/ICCV21_MotAdv_Supp.pdf
- __MACOSX/ICCV21_MotAdv_Supp/._ICCV21_MotAdv_Supp.pdf
