# Supplementary material
Source: ML conference proceedings conference paper supplement (https://openaccess.thecvf.com/content/ICCV2021/html/Guo_Learning_To_Adversarially_ICCV_2021_paper.html)

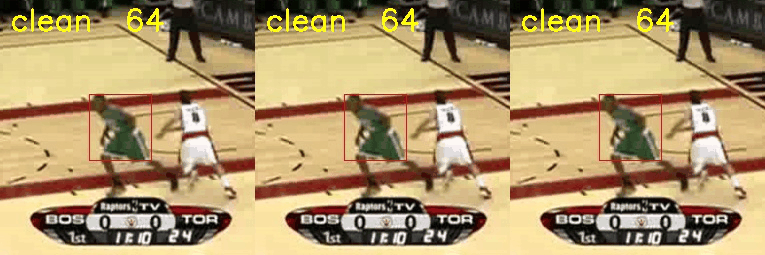

Supplement: Supplementary file 3 [file Guo_Learning_To_Adversarially_ICCV_2021_supplemental.zip › ICCV21_MotAdv_Supp/case4.gif]

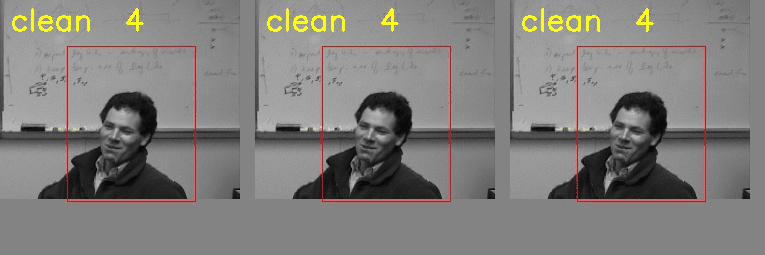

Supplement: Supplementary file 3 [file Guo_Learning_To_Adversarially_ICCV_2021_supplemental.zip › ICCV21_MotAdv_Supp/case5.gif]

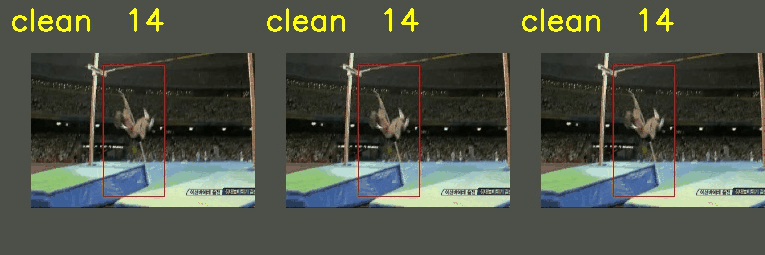

Supplement: Supplementary file 3 [file Guo_Learning_To_Adversarially_ICCV_2021_supplemental.zip › ICCV21_MotAdv_Supp/case6.gif]

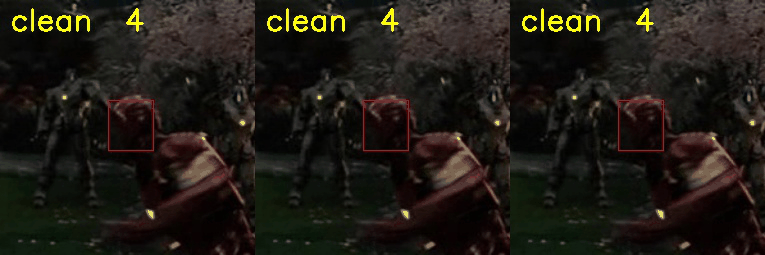

Supplement: Supplementary file 3 [file Guo_Learning_To_Adversarially_ICCV_2021_supplemental.zip › ICCV21_MotAdv_Supp/case2.gif]

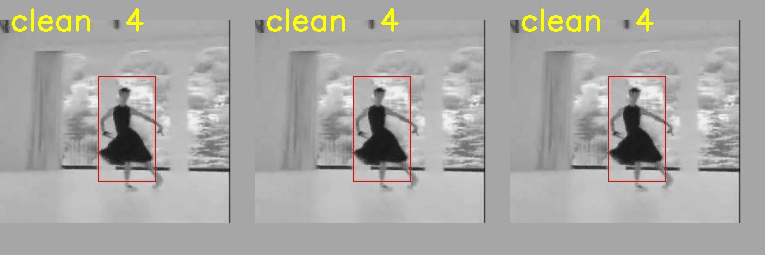

Supplement: Supplementary file 3 [file Guo_Learning_To_Adversarially_ICCV_2021_supplemental.zip › ICCV21_MotAdv_Supp/case3.gif]

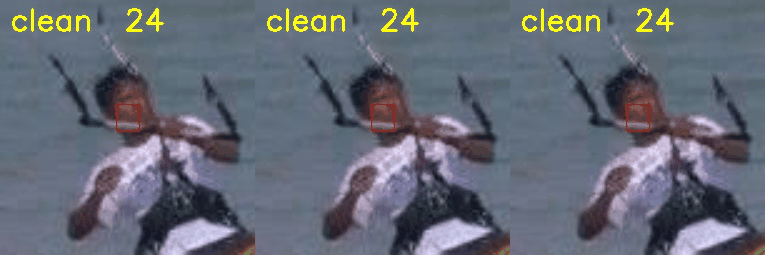

Supplement: Supplementary file 3 [file Guo_Learning_To_Adversarially_ICCV_2021_supplemental.zip › ICCV21_MotAdv_Supp/case1.gif]

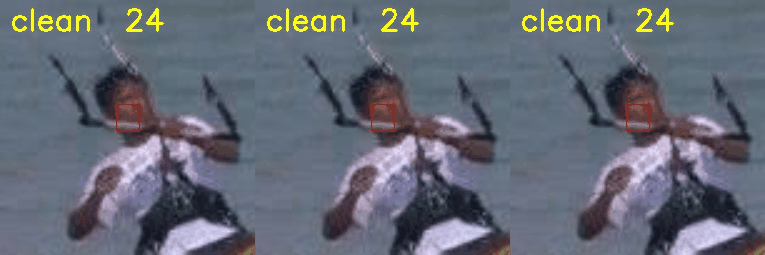

Supplement: Supplementary file 3 [file Guo_Learning_To_Adversarially_ICCV_2021_supplemental.zip › ICCV21_MotAdv_Supp/case0.gif]
